# Supplementary material for: Morphological and Transcriptome Analysis of Flooding Mitigation of the Damage Induced by Low-Temperature Stress on Direct-Seeded Early Indica Rice at the Seedling Stage
Source: MDPI journal article supplement (doi:10.3390/agronomy13030834), 2023-03-13
Supplement: s1 [file s1]

## Supplementary material

**Table S1** Genes for qRT-PCR.

| Number | GeneID              | Description                                                 |
|--------|---------------------|-------------------------------------------------------------|
| 1      | <i>Os07g0529600</i> | Thiamine thiazole synthase 2, chloroplastic                 |
| 2      | <i>Os01g0581300</i> | Lycopene epsilon cyclase, chloroplastic                     |
| 3      | <i>Os02g0704000</i> | 9-cis-epoxycarotenoid dioxygenase NCED1, chloroplastic-like |
| 4      | <i>Os03g0743900</i> | ATP-sulfurylase 3, chloroplastic                            |
| 5      | <i>Os01g0866400</i> | Fructose-1,6-bisphosphatase, cytosolic                      |
| 6      | <i>Os02g0664000</i> | Probable phospholipid hydroperoxide glutathione peroxidase  |
| 7      | <i>Os07g0170300</i> | YT521-B-like protein family protein                         |
| 8      | <i>Os07g0636000</i> | Similar to H/ACA ribonucleoprotein complex subunit 4        |

**Table S2** Primers used for qRT-PCR verification of differently expressed genes.

| Gene                | Forward primer       | Reverse primer       | Amplicon size (bp) |
|---------------------|----------------------|----------------------|--------------------|
| <i>Os03g0743900</i> | AAGAGTTTGCCAGACGCAAT | CATGCTGCTTCATTCTCCAA | 204                |
| <i>Os01g0581300</i> | GAAACCGTGTCTACCCTGGA | GAAGAAAGCGTCGAACCAAG | 505                |
| <i>Os02g0704000</i> | TGAAGTCCATGAGGCTTTCC | GCTACCAACTGCTCGTCCTC | 193                |
| <i>Os07g0529600</i> | CGTACGAGCTCTCCAAGGAC | ATGACGGTGGAGGTGAAGAG | 214                |
| <i>Os01g0866400</i> | AAATTTCCCCAGGATGGTTC | GCCTGTGAAAGCTTGTCTC  | 484                |
| <i>Os02g0664000</i> | AGTGTGGCTTGACCAATTCC | GATGGGTGCAGTGTGTCAC  | 766                |
| <i>Os07g0170300</i> | CCTAGTGGGCGTTTTGGTAA | GTGGTCCCAACGGAGAAGTA | 562                |
| <i>Os07g0636000</i> | GCTGTTATGGCGACTTGTGA | CACTCAGCTGGGGTCTTCTC | 179                |

In the following sequences, the gray part is 5'-UTR, the pink part is 3'-UTR, the purple part is 'Start'-codons, and the red part is 'Stop'-codons.

**Os03g0743900-01** class=Sequence position=[chr03:30532225..30535298 \(- strand\)](#)

GAGAGCAAAT CGAGGTAGCC ATG GCGATGC AGGCCGCCTT CGCCGCCTCG ATGTTCCCGC  
AGCTGGCGCA GCGGAGGGGA AGCGATCGCG CGGTGGTGGT GGCGCCGCCG GCGCCGGCGC

|            |            |            |            |             |             |
|------------|------------|------------|------------|-------------|-------------|
| CGGTGAGGGT | GGCGATGAGG | AGCGGTGGGG | CGGCGGCGGC | GGCGGCGAGA  | GGGGTGAGGT  |
| GCAGGGCGAG | CCTGATCGAG | CCCGACGGGG | GGAGGCTGGT | GGAGCTGGTG  | GTGCCGGAGG  |
| AGGGAGGGCG | GCGGGAGGCG | GCGCGGCGGG | AGGCGGCGGC | GCTGGCGCAC  | CGGGTGAGGC  |
| TGGGGCGGGT | GGAGACGGAG | TGGCTGCACG | TGCTGAGCGA | AGGGTGGGCG  | AGCCCCGCTGC |
| GAGGGTTCAT | GCGCGAGGCC | GAGTTCCTCC | AAGCACTTCA | TTCAACGCC   | ATCCGCGGCG  |
| GAGACGGGGC | CATGGTCAAC | ATGTCCGTGC | CCATCGTCCT | CCCCCTCGGT  | GACGCCCAGC  |
| GCCGCGCCAT | CGAGGCGTCC | GGCGCCCCGC | GCGTCGCGCT | CGTCGACGCC  | GCCGACCGCC  |
| CCCTCGCCGT | CCTCAGCGAG | TGAGACATCC | CCCCTACCCC | ACCTCTTCTT  | GTTTCCCTTG  |
| TTTAGTTAGT | TGCATTTCCC | TGTCAGACG  | CTTAATTGCA | ATTATTTGGT  | TACTAGGAGT  |
| GCTTGCTAGA | AGAGTAAAAT | TACTAATTAC | ATGAGTGGAT | GGAATGTAGA  | TATATTGATT  |
| GTTCTGTGTG | GTTGGTTGAT | TCTCACAGTT | GTGGGATGCC | TTTGGACCTC  | CAAAAGCCGT  |
| AATTTTTGTG | CTTGGGTTGG | AAATTGGAAT | TGTGGGGGTT | GTAGCCTGAA  | TGGTTCAGAG  |
| AAGTTCATAG | GTGGTTTCTT | CAATTGGAAG | CATAATATGC | AGAAATACAG  | ATTATGAGTG  |
| TTTCTGTGCA | GTTCCACAT  | TTCGTGAGCT | TATCCCTCAC | AAACTTGTGC  | TCTGGTTATA  |
| TTTTAGACTT | TAATGCTAGT | AAACAATTTG | TTTCACAGCA | ACCTGGTCAA  | TGATATATCA  |
| TTCATGGCGG | AGGTTTTATC | TTGGGCGTTA | AACTAATTTT | AAGGTTGTGG  | CATTCCCTCT  |
| TTGTCGATTA | GACTACAATA | TCGTCATGCG | GATAACCTTT | GTCATGCTAT  | ATCAGGAAGT  |
| CAGGACATCT | TTATACATCT | CGGTCGTTTT | CAGGTCATAT | TTTTTTGAGT  | CGTATATATA  |
| TAATACGATG | ATCGGTAATA | CCATTGGTAG | TCCTTATAAA | TACATGTTCC  | GTAGTTCTTT  |
| TGCCGTGTTT | TCTAGGTATT | TTAGTTTTAT | CTATATTAAA | CTGACAAGTG  | ATATTATATT  |
| TGTTTCGTTG | TTTTTTCGCC | GCGTTCATG  | GGTATTTTAG | TTTAAGCAAC  | TGACACATGA  |
| TATGATTTAC | ATCAGAAAGA | TTATTTTTTA | TTCACCATT  | GTTTATAAGG  | TTTTGTACAC  |
| ATCCAGCTAT | TGTAAGATGT | TGTTATAGAG | GTGACGTAAC | AACGTCAACC  | GTTTACATCT  |
| GTGTCTAGGA | ACTCCTCAAG | TCATGTGTGT | TCAAAACAAT | CCGACTTGAT  | TTAGCATGGT  |
| TTTAGTCTT  | TTTAATTAGT | TATACCATGG | CATTCCCTGA | CATATTTTTC  | TTCTTTGTTG  |
| TCAGCATTGA | GATCTACAAG | CATAACAAAG | AAGAAAGGAT | TGCACGGACA  | TGGGGAACAA  |
| CTGCACCTGG | GCTGCCTTAT | GTTGATGAGG | CGATTACAAA | TGCTGGTGAT  | TGGTTAATTG  |
| GTGGTGACTT | GGAGGTTATA | GAACCAATCA | AGTACAATGA | TGGTCTTGAT  | CAGTATCGCT  |
| TGTCTCCAGC | CCAGCTGCGT | GAAGAGTTTG | CCAGACGCAA | TGCTGATGCG  | GTATTCGCGT  |
| TTCAGCTTCC | CAATCCTGTA | CACAATGGAC | ATGCTTTGCT | CATGACTGAT  | ACACGCAAAC  |
| GCCTTCTTGA | GATGGGTTAC | AAAAATCCTG | TTCTTCTGCT | TCATCCATTG  | GGAGGATTCA  |
| CAAAAGCAGA | TGATGTGCCT | CTTAGTTGGA | GAATGAAGCA | GATGAAAAG   | GTACGCTTTA  |
| AGAGTAGCAA | TCGTAAGTGC | AAATCTTTTT | AGCAAATGCA | TGTTGGTGCC  | TTGTTGTTGA  |
| TGAAACCAT  | TGATTTAATT | ACACTACTGT | AAGGCCCAAT | TCATGCACAA  | TTTTGATGCG  |
| TGTTTATTTT | GGTAGGTTCT | TGAGGAAGGT | GTCCTCAACC | CAGAATCAAC  | TGTCGTTGCA  |
| ATCTTCCCCT | CTCCAATGCA | TTATGCAGGG | CCAACTGAAG | TGCAATGGCA  | TGCTAAGGCT  |
| CGTATAAATG | CTGGTGCAAA | CTTCTACATA | GTTGGAAGAG | ATCCTGCTGG  | TATGGGCCAC  |
| CCAACTGAAA | AGAGGGACCT | GTATGATGCT | GATCATGGGA | AAAAGGTGTT  | GAGCATGGCT  |
| CCTGGGCTTG | AGAAGCTCAA | TATCCTTCCT | TTCAAGGTAT | GTCATCCTAC  | CAGACCAGAT  |
| ATCACATTTT | TTGGATGCAC | TAGATTGTGT | AGTTCGCTAG | CTTACTGTCC  | ATCTTGATCA  |
| TTTGAATTTG | GATGTCAAGC | AACATATTTT | AGTTTTCAGA | TAAACCTTGT  | TGTATTCTTT  |
| TTCTTGCCAT | GACTCCTGAT | TTGTTTTATC | AGGTGGCTGC | ATATGACACA  | AAGCAAAAGA  |
| AAATGGACTT | TTTCGATCCA | TCAAGGAAAG | ATGATTTCTT | GTTTCATCTCT | GGCACAAAGG  |
| TAACATCCAT | TTCAATCCTG | TTTTGGTACA | CCAGTTAATT | TTGAGCACCA  | ATGTTTTTTT  |

|            |            |            |             |            |                    |
|------------|------------|------------|-------------|------------|--------------------|
| CCAGCCCAGT | CCTAACAACA | TTGCCTGTGT | TATATAGATG  | CGTACTCTTG | CCAAGAACTG         |
| CCAGAGCCCC | CCTGACGGAT | TCATGTGCCC | GGGTGGCTGG  | AAGGTCCTTG | TTGAATACTA         |
| CGACAGCTTG | ACGCCATCAG | CGGACAGCAG | CAAACCTGCGC | GAGGCGGTTG | CGGCC <b>TAGAA</b> |
| AGCTGAAACT | ACCTCAAATA | AGCAAGAACA | TTGCATCTTG  | CAACTGTAAA | ATGGTTCTTT         |
| CAGAGAGAGA | ACCAATGGTA | TATGTGTATA | CTACTGGTCG  | CAAGGCCTAA | ACATTGGGGT         |
| TTGATTGGAA | GCGC       |            |             |            |                    |

>**Os01g0581300**-01 class=Sequence position=[chr01:22535013..22538645 \(+ strand\)](#)

|                   |                         |                    |                   |                    |                   |
|-------------------|-------------------------|--------------------|-------------------|--------------------|-------------------|
| AGACGCAGAG        | ACCAGTAGCT              | TTCGCAGAGG         | CGGCAGCCAC        | CACCGCCTCC         | TCCTCCTCCT        |
| CCTCATCCGA        | CGGTGTGCAA              | CCAAGCG <b>ATG</b> | GAGTTCTCCG        | GCGGCGCGAC         | CGTGTGCGCG        |
| CCGTTGCGTT        | GCTGCCGTGC              | GGCGTGGGGC         | GCCGCGGCGG        | CGGGTGCGGG         | GGCGGAGGGA        |
| AGGAGCAGGA        | GGGTTGTGCC              | GCGCGCGGTG         | GAGCCGCGGC        | GGCGCGGGCG         | GTGGATGGTG        |
| AGGTGCGTGG        | CGACGGAGAA              | GCACAAGGAC         | GCGGCGGCGC        | GGCGCGGGCG         | CGTGGAGGTG        |
| GAGTTCGCCG        | ACGAGGAGGA              | CTACGTCAAG         | GGCGGCGGCG        | GCGAGCTTCT         | CTACGTGCAA        |
| ATGCAGGCGT        | CCAAGTCCAT              | GGACAGCCAG         | TCCAAGATCT        | CCTCCAAG <b>GT</b> | AGGAGGAGTA        |
| GCAGTAAATA        | AATCATATCA              | CTACTCCAAT         | TTTTTTTGTT        | TGTTTATGCA         | TGCCTAGATG        |
| ATCTTGATTT        | TAGCAGTTAA              | TTAGCATTAT         | GCAAGGTCGA        | GATCTGGCTT         | TATACAAAAC        |
| CCACAATCAC        | CTTGCTGCCA              | TGGTTGCCGT         | TTACAAGAAA        | GAATCAAACA         | CGAAATTCAT        |
| CAACAGCATG        | AATGAAACAC              | TGTTGCATCG         | CCCTGATCAC        | GCGCGTGCTA         | CGACGACGGG        |
| TGTGGAATGT        | TGATTCACGT              | GATGCTATCA         | CGAATTCACT        | CCATATCTTG         | ACCAAAAAAA        |
| AAAAAAGAGC        | AGCCTCTGGT              | TGCCATGCT          | TGCTGCTGCC        | TGCCATATCT         | CTGTGGAGCT        |
| TGGACTATTC        | TCCATGTCTC              | CTGTAATGGG         | AGCTCACGTC        | GTCGCCTGTA         | CAAAAGGTGT        |
| TAATTAGGGG        | ATAAGTTAAG              | AGTATCTCAT         | ACTGTTCTCA        | ACTCAACTGC         | TGACTAATTA        |
| CACCTTCGGA        | TGCAACTTGG              | AACGTACTGT         | TGCATTAATT        | ATTGTCTGCT         | TGCAAATTTT        |
| TCAGAGATGT        | TGAATTTGAT              | GAAGTGACG          | TGCGTCGCAT        | TTGCAGTCCA         | ACATCACACC        |
| TTTGACTTGA        | TGTGATTCAA              | GCAACAAGTG         | AAGTGCTAGG        | CTAAACACAA         | GCACAGTTCC        |
| CCGAAATCAT        | GCCATTTATT              | CTTGACACAT         | GGACATCCTG        | GAAATTGTTC         | AAAGTTTCTA        |
| GACTGCTAGG        | AATGCGAATA              | ACTTGTA            | AACTTTTGAA        | ACATTTTGT          | CAGCCCAATC        |
| AGGATTTTTT        | TTAGTTTATT              | TCCTGAAACT         | CTGCATTGGA        | ACGAATAAAT         | AAATGGTGTC        |
| TCAAGAAAAT        | AAAGCACGTG              | CTCTGAATCT         | TTGTGTGCAG        | <b>CTGCTGCCCA</b>  | <b>TACCCGATGA</b> |
| <b>AAATTCAGTT</b> | <b>CTTGATTTGG</b>       | <b>TCATCATTGG</b>  | <b>CTGCGGTCCA</b> | <b>GCTGGCTTAT</b>  | <b>CCCTAGCAGC</b> |
| <b>AGAGTCAGCT</b> | <b>AAGAAAGGGC</b>       | <b>TCAATGTTGG</b>  | <b>TCTCATTGGC</b> | <b>CCTGATCTTC</b>  | <b>CATTACAGAA</b> |
| <b>CAACTACGGT</b> | <b>GTGTGGGAGG</b>       | <b>ATGAATTCAA</b>  | <b>AGGTAGCATA</b> | <b>CTATTTTCAG</b>  | <b>CACTGAATAA</b> |
| <b>CATTGTTGCC</b> | <b>ATCATAATTT</b>       | <b>GGTACATGAT</b>  | <b>GGACTTATGG</b> | <b>CTCTTGATCT</b>  | <b>TTTGCTATCC</b> |
| <b>AGACCTGGGC</b> | <b>CTGGAGAGCT</b>       | <b>GCATTGAACA</b>  | <b>TGTCTGGAAG</b> | <b>GATACTATCG</b>  | <b>TGTACCTAGA</b> |
| <b>CGGTAACAAG</b> | <b>CCAATAATGA</b>       | <b>TTGGCCGTGC</b>  | <b>GTATGGCAGG</b> | <b>GTTACAGGG</b>   | <b>ACTTGCTGCA</b> |
| <b>CGAGGAGTTG</b> | <b>CTGAGAC<b>GT</b></b> | <b>AAATTTTCAG</b>  | <b>TTAGCAATCT</b> | <b>TGAGAGTAAA</b>  | <b>CAGAGTCAGG</b> |
| <b>CAAAGTGATA</b> | <b>CAAAATTATT</b>       | <b>GATGAAAAAT</b>  | <b>TATACTCTAA</b> | <b>AAACTGTCAG</b>  | <b>ATGCTATGAC</b> |
| <b>GCTGGCGTCA</b> | <b>CATACCTCAG</b>       | <b>CTCGAAGGTG</b>  | <b>GACAAGATCA</b> | <b>TGGAATCTCC</b>  | <b>TGATGGACAT</b> |
| <b>CGGGTAGTCT</b> | <b>GTTGTGAAGG</b>       | <b>GGATCGTGAG</b>  | <b>GTA</b>        | <b>CTTTGCA</b>     | <b>GGCTTGCCAT</b> |
| <b>GGGGCAGCAT</b> | <b>CTGGTAGGCT</b>       | <b>TCTAGAGTAC</b>  | <b>GAGGTTGGTG</b> | <b>GTCCGCGTGT</b>  | <b>TTGTGTGCAG</b> |
| <b>ACTGCATATG</b> | <b>GTGTGCAAGT</b>       | <b>CGAGGTATGC</b>  | <b>ACA</b>        | <b>ACTCCTA</b>     | <b>TAGAACTTAC</b> |
| <b>AGTTTAGAAT</b> | <b>AGTTTCCCTT</b>       | <b>CTGTCGTCGT</b>  | <b>GTTTCTACGA</b> | <b>GCATTTTATT</b>  | <b>CATATTGTTT</b> |

|             |            |            |            |            |            |
|-------------|------------|------------|------------|------------|------------|
| CAAGCTGAAA  | ATTTTAGATA | TGTTATTTGG | GCACATGTCA | TTCATCTTTC | ACAATGATTT |
| GAAAAATTTTC | AGGTGGAAAA | CAATCCATAT | GATCCCAGCT | TAATGGTTTT | CATGGACTAC |
| AGAGATTGCT  | TCAAAGACAA | ATTCTCACAT | CCTGAGCAAG | GAAATCCAAC | GTTCTCTAT  |
| GCCATGCCCA  | TGTCATCCAC | ACGAATTTTC | TTTGAGGTCC | ATATGAGAAA | CTTTATCACA |
| ATTTATTCCT  | CCGACTAGTA | TTTTCCCATG | CTTTGTGTT  | GCTGATGATA | ATTATTTCAA |
| GACAGGAAAC  | ATGCCTAGCT | TCTAAAGAA  | CAATGCCCTT | TGACCTCCTT | AAAAAGCGGT |
| TGATGTCTCG  | GTTGGATGCA | ATGGGAGTTC | ATATTCGAAA | AGTATACGAG | GAGGTAACAA |
| GTTATGGCTT  | GGTGTCACTA | GTTGTTTCTC | TTGCATAGGT | GAAGTGGA   | CTTAACCTAA |
| ATGCTGAACT  | CTTGATTICA | GGAATGGTCC | TACATTCCTG | TTGGAGGGTC | CTTACCAAAT |
| ACAGACCAGA  | AAAATCTCGC | ATTTGGTGCG | GCAGCAAGTA | TGGTGCATCC | TGCAACCGGT |
| ACTAACAAAT  | CCTCAATCCG | TACTTTCAAT | TTCTCTTGTA | TTTACAGGCA | ATAATATAAT |
| ATTTATCTGT  | CAAAAACATA | GGATACTCGG | TGGTTAGATC | ATTGTCTGAA | GCTCCAAGAT |
| ATGCATCTGT  | GATATCTGAT | ATCTTGAGAA | ACCGTGTCTA | CCCTGGAGAA | TATTTGCCTG |
| GAACCTCTCA  | AAGTTCCAGT | CCATCAATGC | TTGGTAAGCA | TTCTTCTGAT | ATTTATTCAA |
| TTTTATTGAC  | AAGCACACCA | GTATTACAAA | TTGGAGTACA | TTGCTTCAGA | TGAGGGCAGT |
| ATTTTAGTAT  | AATTTTGAA  | ATGTCAGGAA | CATTTTCTGG | TACTAATTGC | TATGCGGTGT |
| TGCAGCATGG  | AGAACATTAT | GGCCCCAAGA | ACGGAACGCT | CAACGATCAT | TCTTCCTTTT |
| TGGGCTGGCT  | TTGATAATCC | AACTGAATAA | CGAAGGCATT | CAGACATTCT | TTGAAACCTT |
| TTTCCGGTTG  | CCCAAATG   | AATTCTACTC | TTGATTGCAT | TTGCCTCTGT | TTTCAGTCTA |
| TTTACAAATA  | CCATTATGTA | TGACCTGAAG | ATTGCCACCC | AACAAAGTGT | TCATCACTGT |
| TCTTTGTTAC  | TATCAGGATG | TGGCGAGGAT | TCCTTGTTTC | GACGCTTTCT | TCAGTGGATC |
| TCATACTCTT  | TGCATTCTAC | ATGTTACAAA | TTGCGCCGAA | CCAAATGCGA | ATGAACCTTG |
| TCAGACATCT  | CCTCTCTGAT | CCGACCGGCT | CAACGATGAT | CAAGACCTAC | CTGACCTGT  |
| AAACCATT    | CAGCAGTCTA | CAAGAATATT | AGGAAATGTA | CAGTTTGTGA | GTTTGTACAT |
| AACATAGTGA  | GAGCCAGAGG | ATATGGGGGT | TGGGGGGTTA | CTTATCATGC | TAGAACAACA |
| AAACACTGCA  | AGAATTTTAT | GCATGAATTT | GGC        |            |            |

>Os02g0704000-01 class=Sequence position=chr02:29026099..29028176 (- strand)

|            |             |            |             |            |            |
|------------|-------------|------------|-------------|------------|------------|
| AGTGCAGTAG | TAGTAGCATG  | CAAAGGATTT | GCCCTGCTCA  | CTGCTCGGTC | ACTCACTCAC |
| TCACCATGAA | GTCCATGAGG  | CTTTCCTACA | TCCCTCCTGC  | TGCTTCTGCT | GCTCCACAGA |
| GCCCCAGCTA | TGGCAGGAAG  | AAGAACGCCT | CCGCCGCTCC  | GCCATCGGCT | GCCGCCTCCA |
| CCACCGTTCT | CACCTCCCCG  | CTGGTGACCA | CCACCCGCAC  | TCCGAAGCAG | ACCGAGCAAG |
| AGGACGAGCA | GTTGGTAGCC  | AAGACCAAGA | CTACGAGAAC  | TGTTATTGCT | ACGACGAATG |
| GCAGGGCGGC | GCCGAGCCAG  | TCTCGGCCTC | GCCGCCGGCC  | TGCCCCCGCC | GCCGCGGCGT |
| CGGCCGCTTC | GCTGCCGATG  | ACGTTCTGCA | ACGCGCTGGA  | GGAGGTGATC | AACACGTTCA |
| TCGACCCGCC | GGCGCTTCGG  | CCGGCGGTGG | ACCCGCGGAA  | CGTGCTGACC | AGCAACTTCG |
| TGCCCCGTGA | CGAGCTGCCG  | CCGACGCCCT | GCCCCGTCGT  | GCGCGGCGCC | ATCCCCGCGT |
| GCCTCGCCGG | CGGCGCCTAC  | ATCCGCAACG | GGCCCAACCC  | GCAGCACCTC | CCGCGCGGGC |
| CGCACCACCT | GTTTCGACGGC | GACGGCATGC | TGCACTCCCT  | CCTCCTCCCG | TCGCCCCGCT |
| CGTCCGGCGA | CGACCCCGTC  | CTGTGCTCGC | GCTACGTGCA  | GACGTACAAG | TACCTCGTGG |
| AGCGCGACGC | CGGCGCGCCC  | GTCTGCCCCA | ACGTCTTCTC  | CGGCTTCCAC | GGCGTGGCCG |
| GGATGGCGCG | CGGCGCCGTC  | GTGGCGGCCA | GGGTCTCTGAC | CGGGCAGATG | AATCCGTTGG |
| AGGGCGTCGG | GCTCGCCAAC  | ACCAGCCTCG | CCTACTTCGC  | CGGCCGCCTC | TACGCGCTCG |

|            |            |            |            |            |            |
|------------|------------|------------|------------|------------|------------|
| GCGAGTCCGA | CCTCCCCTAC | GCCGTGCGCG | TCCACCCGGA | CACCGGCGAG | GTGACCACGC |
| ACGGCAGGTG | CGACTTCGGC | GGCCGCCTCG | TCATGGGCAT | GACCGCGCAC | CCCAAGAAGG |
| ACCCCGTCAC | CGGCGAGCTC | TTCGCGTTCC | GCTACGGCCC | CGTGCCGCCG | TTCGTGACGT |
| ACTTCCGGTT | CGACCCGGCC | GGCAACAAGG | GCGCCGACGT | GCCCATCTTC | TCCGTGCAGC |
| AGCCGTCGTT | CCTGCACGAC | TTCGCCATCA | CCGAGCGGTA | CGCCATCTTC | CCGAGATCC  |
| AGATCGTGAT | GAAGCCCATG | GACATGGTGG | TGGGCGGCGG | CTCGCCCGTG | GGGTCGGACC |
| CCGGCAAGGT | GCCCCGCCTC | GGCGTGATCC | CGCGCTACGC | CACCGACGAG | TCGGAGATGC |
| GGTGGTTCGA | GGTGCCGGGC | TTCAACATCA | TGCACTCGGT | GAACGCGTGG | GAGGAGGCCG |
| GCGGCGAGGA | GCTGGTGCTG | GTGGCGCCCA | ACGTCTCTCT | CATCGAGCAC | GCCCTGGAGC |
| ACATGGAGCT | AGTGCCTCC  | TGCGTCGAGA | AGGTGCGCAT | CAACCTCCGC | ACCGGCGTCG |
| TCACGCGCAC | CCCCTCGCC  | GCCGGGAACT | TCGACTTCCC | CGTGATCAAC | CCGGCTTTCC |
| TCGGCCGCCG | CAACAGGTAC | GGCTACTTCG | GCGTCGGCGA | CCCCGCGCCC | AAGATCGGCG |
| GCGTGCCAA  | GCTCGACTTC | GACCGCGCCG | GCGAGGGCGA | CTGCACCGTG | GCGCAGCGCG |
| ACTTCGGGCC | CGGGTGCTTC | GCCGGCGAAC | CGTTCTTCGT | GGCCGACGAC | GTGAGGGGCA |
| ACGGCAACGA | GGATGACGGG | TACTTGGTGT | GCTACGTCCA | CGACGAGGCC | ACCGGCGAGA |
| ACCGGTTCTG | GGTGATGGAC | GCGCGGTCGC | CGGACCTGGA | GATCGTCGCG | GAGGTGCAGC |
| TGCCCCGACG | CGTCCCCTAC | GGCTTCCATG | GCCTGTTCGT | CACGCAGGCC | GAGCTCCAGT |
| CACAGCACCA | ATGATACAAA | CCAACGTAGC | AATGTATAGA | ATTCACGTAT | ACATTTTCCA |
| TACGAAATTA | CGAGTTACTG | TGGAACACGT | AGTATAAGTG | CACACATACT | TCGAGAAAAT |
| TATGTAGAGT | ACATATGAAA | TGAAAGAATG | ATTTTAAC   |            |            |

>Os07g0529600-01 class=Sequence position=chr07:20724581..20726069 (+ strand)

|            |             |            |             |             |            |
|------------|-------------|------------|-------------|-------------|------------|
| ACTCACACAC | ACTCTCTCTCA | TCCCAGAGCA | AGAAGCTCAG  | CTCCTCTCTCC | TCTCGCATGG |
| CAGCCATGGC | CACCACCGCG  | TCCAGCCTCC | TCAAGACCTC  | CTTCGCTGGC  | GCGCGCCTCC |
| CCGCCGCCGC | CCGCAACCCC  | ACCGTCTCCG | TCGCGCCGCG  | CACCGGCGGC  | GCCATCTGCA |
| ACTCCATCTC | GTCGTCGTCG  | TCCACTCCCC | CCTACGACCT  | CAACGCCATC  | AGGTTAGGCC |
| CCATCAAGGA | GTCCATCGTG  | TCTCGCGAGA | TGACCCGGCG  | GTACATGACC  | GACATGATCA |
| CCTACGCCGA | CACCGACGTC  | GTCGTCGTCG | GCGCCGGGCTC | CGCGGGGCTC  | TCCTGCGCGT |
| ACGAGCTCTC | CAAGGACCCC  | TCCGTCAGCG | TCGCCGTCAT  | CGAGCAGTCG  | GTGTCCCCCG |
| GCGGCGGCGC | GTGGCTCGGC  | GGGCAGCTGT | TCTCCGCCAT  | GGTGGTGCGC  | AAGCCGGCGC |
| ACCTGTTCTT | CGACGAGCTC  | GGCGTCGCGT | ACGACGAGCA  | GGAGGACTAC  | GTCGTCATCA |
| AGCACGCCGC | GCTCTTACCC  | TCCACCGTCA | TGAGCCGCCT  | CCTGGCGCGC  | CCCAACGTGA |
| AGCTGTTCAA | CGCCGTCGCC  | GTCGAGGACC | TCATCGTCAA  | GGAGGGCCGC  | GTCGGCGGCG |
| TGGTCAACAA | CTGGGCGCTG  | GTGTGATGTA | ACCACGACAC  | GCAGTCGTGC  | ATGGACCCCA |
| ACGTGATGGA | GTCCAGGGTG  | GTGGTGAGCT | CCTGCGGCCA  | CGACGGGCCG  | TTCGGCGCCA |
| CGGGCGTCAA | GCGGCTGCAG  | GACATCGGCA | TGATCGACGC  | CGTGCCCGGC  | ATGCGCGCCC |
| TCGACATGAA | CACCGCCGAG  | GACGAGATCG | TCCGCCTCAC  | CCGCGAGGTC  | GTCCCCGGCA |
| TGATCGTCAC | CGGCATGGAG  | GTCGCCGAGA | TCGACGGCGC  | CCCGAGAATG  | GTACGCACCA |
| AAAAAACATC | AAACTCTTCA  | CCATAATCTC | TCCCCCGTTC  | TTGGATTGTA  | ACAAATTCGT |
| TGTTGTCAGG | CCCACGTTTC  | GGAGCCATGA | TGATCTCCGG  | CCAGAAGGCG  | GCGCACCTGG |
| CGCTGAAGGC | GCTCGGCCGG  | CCGAACGCCA | TCGACGGCAC  | GATCAAGAAG  | GCGGCGGCGG |
| CGGCGGCGCA | CCCGGAGCTG  | ATCCTGGCGT | CGAAGGACGA  | CGGCGAGATC  | GTGGACGCC  |
| GACGCAATAG | AACAGGGTAA  | AAAAAAATCC | GCAAGACGTG  | GTGGTGACAC  | GGAGGAGTTG |

|            |            |            |            |            |            |
|------------|------------|------------|------------|------------|------------|
| GGGACGAGAA | GAAGATGTGG | ACTTTCCCT  | GTGTTTTTTT | TTCGGGATTT | GCATTGATCC |
| CCTTGTTTGT | TTTAGCTCTG | GATGTTGATT | AGCGTCTTGT | TCATAGCACT | TCCACTGCCA |
| CCGTGTGTGT | GTGCTCTGCT | TGCCTGATGA | GGGCAAGAAA | ACTTCCATGG | ATCCGTCTCT |
| CTGGGAGGAA | TGAATAAAAA | GGATGAGGAA | ATAAAAATGA | TTCAGTGCC  |            |

|             |             |             |             |            |             |
|-------------|-------------|-------------|-------------|------------|-------------|
| CCGACGACGCC | GGAGAGTGTAG | GCGAGGGCGAA | GCGAAGGGAA  | GAGCGCGAGG | CAGAGTAAGC  |
| AGACGAGAAG  | AACAGCGCGC  | GGCGCGGTAG  | CTGAGGAGAG  | TGGTGCGGAG | ATCGATCACG  |
| AGGCGGACGC  | GTACCGGACG  | GACCTGATGA  | CGATCACGCG  | GTACGTGCTG | AACGAGCAGA  |
| GCCGCAACCC  | GGAGGCACGC  | GGCGACCTCA  | CCATCCTCCT  | CTCCACATC  | GTGCTTGGCT  |
| GCAAGTTCGT  | CGCCTCCGCC  | GTCAACAAGG  | TCACACGAAT  | CCTCCCGTTG | TTTCATCGTT  |
| AGGCGTACGG  | ATCTCTCGGT  | TCTACTCTA   | CTGATTGGCA  | CGCTGAACAA | AATTCTCGG   |
| GTTGTGCATG  | CAGGCCGGGC  | TCGCCAAGCT  | CATCGGGCTG  | GCCGCGCAGA | CCAACGTTCA  |
| GGCAAGTGTA  | CCTGGCAATA  | ACTGTCATCT  | TTCTCAGTTT  | CTTGCTCTG  | AGATTGAGAT  |
| AGTGAGGACT  | GAGGACTTGC  | TTGGTGTGAC  | CAGGGAGAGG  | AGCAGAAGAA | GCTGGACGTG  |
| CTGTCCAACG  | AGGTGTTTCG  | CAAGGCTCTC  | GTCAGCAGCG  | GCCGCACCGT | ACGAACTCAC  |
| TCTCTTCTCC  | CCTTAAACCA  | TTTCTTTGCT  | CAGAGTGTTT  | TCAATATTTA | TGGTTTTTCA  |
| CTGCGATCGC  | GTGCAGTGCG  | TTCTTGCTCTC | CGAGGAGGAC  | GAGGAAGCGA | CGTTCGTGGA  |
| CCCTGCGCTG  | CGTGGGAAAGT | GCGTAGCTTC  | GGATCAGAAA  | CGCGACCTCT | CTGCTTCTTG  |
| ATTCGAGCAA  | TCTGTTGTTC  | TGTTTTTCCT  | GACAAAATAC  | ATGCATGGTG | CCGGTTTTTT  |
| TTACAGGTAT  | TGCGTGTGCT  | TTGATCCACT  | CGACGGCTCC  | TCCAACATCG | ACTGTGGCGT  |
| CTCCATCGGA  | ACGTGTCGTA  | CACATGAAAC  | CACCAAACCG  | AAAAGATAAC | ACTGACAACT  |
| CGGAAGAACG  | GCAAGTCGCT  | GTTCAATTTG  | CAGTTTTGGC  | ATCCTTCTAG | GATGGTGACG  |
| TGAAAAAGGG  | AGAACTTTTG  | GCCAAAGCAA  | CATATGAAAA  | ATACTATTCC | TCCATCAGTT  |
| GTGAATTACT  | GCTAGCATGC  | TTTTCTGAGG  | ACACGAGTAC  | TGCTTTCAAA | AACTGAAAAAT |
| TTCAGCAGCA  | AGGTGTTGTG  | TGAGTGTGAC  | AGTGAAAAAGT | TGATAGCAAG | TCTTAACTTT  |
| TAACGGATTC  | TAGACTCTAG  | GGTCAACTTG  | AATTGTCTTC  | GAACAATACT | CGATTTCGATT |
| CGTCAGAAGG  | ACCTTTAATG  | GATTCCTGTA  | CTACATGTTC  | TTTCTCTTGT | TTTATAGATC  |
| TTTGGGATCT  | ACATGATCAA  | AGATAAGGAG  | AATGTGACTC  | TTGAGGACGT | GTTACAGCCT  |
| GGAAAAAACA  | TGGTTGCTGC  | TGGATACTGC  | ATGTACGGCA  | GTTCTGTCAC | GTAATCGAC   |
| CTCCTAATCC  | ATCCTACTCT  | ATAAATGTCA  | TAATTCTCAC  | CTGAATATAA | CCTGTGTAAC  |
| TAATTTGATG  | CAGCTTGTTT  | TGAGTACTGG  | AAATGGTGTC  | AATGGCTTCA | CACCTTGATC  |
| ATCTCTCGGG  | GAGTTCATAT  | TAATCATCC   | AGACATCAAG  | GTTTATAAGA | CAATTTTTTT  |
| TGACTAACTG  | TTTATGAGAC  | AATTAGTAGT  | GATACTCCG   | TCTTTTAATG | TACACTGATG  |
| AGCGGGCAAA  | ATACTCATAT  | GTGTGTTCTA  | TGCTTCACTC  | TGTGCAGATA | CCAAAGAAAAG |
| GGAAGATTTA  | TTCAGTGAAT  | GAAGGGAATG  | CGAAAAATTG  | GGACGAGCCT | ACCGCAAAAGT |
| ACGCGCTACT  | TATGTTTTCA  | GAATAGTGTA  | CTTCCTGAAG  | AACCTGAGCT | AAAATCTACA  |
| ACAATCATTT  | ACAGGTTTGT  | GGAGAAGTGC  | AAGTTCCCTA  | AGGATGGTTC | ATCACCTAAA  |
| TCCTTGAGAT  | ACATTGGAAG  | GTGATCATTT  | TTTTTGGGTG  | ACAATGTATA | TAACCTAGCT  |
| GTAGTTATTA  | ATAGGAGCTT  | TTTTGACCCT  | CTGTTGTGAT  | TCATAAAAGT | TTCTAATAGG  |
| ATGTAATCAC  | CACCAATTAA  | CATTGTAGTG  | ACAGTATTGC  | TTCCTGATGA | TTTGCAGTAT  |
| GTTTGCTGAT  | GTCCACCGTA  | CGTTGCTATA  | TGGAGGAGTA  | TTTTTGTAAC | CTGCAGACAA  |
| GAAGAGCCCA  | AATGGAAAAAC | TCCGGTACAC  | ATTAAGCCTA  | CTCTCGGCAT | CTCACTTCGG  |

|            |            |            |            |            |            |
|------------|------------|------------|------------|------------|------------|
| TTATGGTACT | TCCAATTTCA | TATTGATAAA | CAATTCTGAA | TTCACCAAAT | CTTGGAATTA |
| CAGTGTCTG  | TATGAAGTTT | TCCCCATGTC | ATTCCTGATG | GAGCAGGCTG | GAGGCCAGTC |
| TTTCACAGGC | AAAGAACGGG | TACTTATTTT | TTCATTCAAT | TCATCTTGAT | TAAAACAGCA |
| TGCATGTTTA | GTATTAGCAT | CTTGAGTTCT | TGAATCCTGA | TACATTGTTT | AAACTTGTTG |
| CTACATTGGC | AATGCAGGCT | CTTGACCTCG | TTCCTACCAA | GATTCACGAG | AGATCCCCAA |
| TATTTCTTGG | AAGCTTCGAA | GATGTGGAGG | AGATCAAAGG | GTTGTACGCT | GCACAGGCGA |
| AGTAA      | GCTCG      | GTTTGATCGA | TCTGGCACCA | TCAAGGCGTG | CGAATGGACT |
| CCCTGGCCTT | ACTGTAACAT | GCATGATTCG | TCAGGCACTT | CTTTTATTCG | TCTTACTGTA |
| CGTTTGTA   | ATTCAGTGTA | ATAGTGTTGA | GGCCTGGAAC | AGCTTCATGA | GCAACTAAGG |
| CCTTTTCTAC | TATTATTTAC | AAAATACATA | CACCGTGCAT | CTCTAGCAGC | TAAAGCACTA |
| ATACAACAAG | TCACTAAGGC |            |            |            |            |

>Os02g0664000-01 class=Sequence position=chr02:26929770..26932403 (+ strand)

|            |            |              |            |            |            |            |
|------------|------------|--------------|------------|------------|------------|------------|
| ATG        | CCGTCTC    | GCACCGCCCC   | GTTTATCTCT | CGCCTCCGGC | TCCTCCGAAC | CGCCGCCGCC |
| CTCTCCCCGT | TCTCGTCCTC | CGCGCCGCCG   | CGGCACAGCC | CCCGCATCCT | CCGCGCTATC |            |
| CCTGTCGGTG | CGCCTCACCC | GCCGCGCGTC   | TCCGCAGCCG | TCTCGCCGCT | GGTCCGTCGG |            |
| GTCGCCGCCG | GGTTCGCGCT | GTTTACGATG   | GCCACCGCCG | CCTCCTCCGC | CGCATCCGTC |            |
| CACGACTTCA | CCGTCAAG   | GTCTGCACTGCC | TCCTGCCCTC | CTCAAACTT  | GGACACCCCT |            |
| TTCCCCTCTG | GTGATTTGGT | CCCCTTTCAG   | CAGCGAGAGA | CTGAAGCTTT | ATACCCATAC |            |
| CCCATACCCC | TCTGGGGGAA | AGTATTTGCA   | CATCGATGCC | TCCGTGATGC | TGCTACGATT |            |
| CGGCCCTTTT | GGGACTTCTT | AAGCCAATAT   | CTTTTGGTT  | TAGCTGCAG  | ATTTTTTTAC |            |
| CCAAATCTTT | GGAGGTTTTT | TACAAGCTGT   | TATACTGCTT | GAATTGTGAT | CCTAATGTTT |            |
| AAAGGACTAT | GCTTTTGGT  | GTTTGCAGGA   | TGCAAGTGGC | AAAGATGTGG | ACCTGAGCAC |            |
| CTTCAAGGGG | AAAGTCCTCC | TTATCGTCAA   | TGTTGCATCT | CAGTGGTACC | AATTATTACC |            |
| AATCCCTCAC | CTCCACAGTG | TCTACGTTTT   | AATTTTGTA  | ACTTGGAAT  | TATTCTAGAA |            |
| TGCATAATGT | GATTTATCTT | TTCATGTTG    | AAATGTTCCA | TGAACAACGA | AACCTTGAA  |            |
| CCCTAGTACT | GCGTTATCAA | GCGCTTAAGT   | TGAATGATAT | GCTCATTTGA | TGCCTAATAT |            |
| AATGTATATT | TTCGATCAAA | CTTCCATTCA   | TGTTGCAAAG | TAAAGATGCC | GAATTTATAT |            |
| GGTTTCATAT | GGAACACATT | CGAGTTTCTA   | TCTAGGCCAT | ATGAGACAAA | TCGAAATTTG |            |
| AAGTATTGTT | CTGCTAAATG | AAACTTTAAA   | AAGAGCCATG | GTAGTGTGTT | TCCCGGAGGA |            |
| TCAGCCTTTG | CATGTAGATT | ATCGATATAT   | GGAAAAAATA | ATAATCTGGT | CAGCAGGTAA |            |
| GTTGGTTTTA | GCTGGACAAC | AGGATGTTGA   | TCTCTTGCCA | ATTGGAAAGT | TGTGTCAGAT |            |
| TGTCATACCA | TAACTATTTT | TTCTATTTGC   | GTCTCATCCT | CCTGTGTTA  | AGGGATACAT |            |
| GTTCTTTAGA | GGACGGCCAT | TTTTTTTTTA   | CTAATTTTAA | AGACCAATGA | GATGCAGATA |            |
| TAATAAAATA | ACATACAAAC | TGATATCATT   | ATCCTCAAAT | TAAGAAATCT | TGTTGCTCTC |            |
| TGTCATTGTT | GCAGTGGCTT | GACCAATTCC   | AACTACACGG | AGCTGAGCCA | GTTGTATGAG |            |
| AAGTACAAGG | ACCAGG     | GTGTTAGATG   | CATCTCATCA | TTTGTTCCCT | CATTATGAAA |            |
| TCTCTCTTGT | GCGCTGAATT | GCTCATATGT   | TCTTTCATTT | GGAGTTTATG | ACCAACCAAT |            |
| TGCTAATGTC | ATTGTCAATT | TGATTTGACG   | ACAGGTTTTG | AGATCCTTGC | TTTCCCATGC |            |
| AACCAGTTTG | GTGGACAGGA | ACCTGGCACT   | AATGAGGAGA | TTGTCCAATT | TGCTTGCACC |            |
| CGCTTCAAGG | CCGAGTATCC | AATTTTTGAT   | AAGGTAAATT | TGGGCACATT | ATACCACTAC |            |
| CTCTTGCAAT | TTTGCACTTT | TTTTTTCATT   | TATCTTTCAA | GCGGAAAGAA | ACAACCTAAT |            |
| CAAGTATATG | TTCACCTTCC | AGAGCCGTCA   | TAATATTTTA | AAGGAAATTA | ATCCCATTCC |            |

|             |             |            |            |            |            |
|-------------|-------------|------------|------------|------------|------------|
| GAAAGTG TTC | CCTTTCATAT  | GTAGCCTGTG | ATGTATTTCC | AGATACTTGT | CTAGTACTTA |
| AAAGGAAATT  | GATCAAGTCC  | ATGAAGTTTT | TATCCGATTC | TTATGCATTT | CGTATGATGT |
| ATGCGATCGA  | TAAGCCTGAT  | ACCAGTTTTA | TCCTTTCATT | TATCACAAGA | AAGAATCATG |
| GATGTTTATA  | ATGTGATGAT  | CAATTGATTT | TTATTGTTTA | GAGAGGTGAG | ATCTAGAAGT |
| TCTAACTACC  | ATTATCTTAA  | TAGGTTGATG | TTAATGGTGA | CAACACTGCA | CCCATCTACA |
| AGTTTCTGAA  | GTCCAGCAAA  | GGTGGTCTTT | TCGGTGACAA | TATCAAATGG | AACTTCTCCA |
| AGTTCTTG GT | CGACAAAGAG  | GGGCGTGTTG | TGGAGCGCTA | TGCGCCAACT | ACTTCTCCAC |
| TCAGCATGGA  | GGTAAATCCC  | GAGCTCCAAG | TGGGTGTAAT | TTGAGTTCCA | TCTCATCAAG |
| CTTCCTTGCC  | TTCACCTACA  | GCGATTGCTT | TAATCATATT | ACAGAAGGAC | ATCAAGAAGC |
| TGCTTGGAAG  | TTCTTAA AAC | CTTACCGCCG | GCGCCACCAG | ATGCACTGCT | GCGTTGCATT |
| GAGCACTTGG  | AACTTCCAAT  | AATGTTGTAA | TAAAACTGTG | CTTGGAATTG | CTGTATTTTC |
| ATTTGCGTAG  | CCCTGCTGTG  | TAATGTATAA | AGTATTAACG | TGTAATGAAA | TTGGCTTACT |
| GCATCACTTT  | GCCCTTTTAT  | TGAAATATTA | TCTCCTGTAT | CTGTGTTCGT | TATTGAGACC |
| TGCGACTGCG  | ATGAGCAAGT  | TTGACGTGT  | AACGTGTACT | CGTTCATCT  | GTGC       |

>Os07g0170300-01 class=Sequence position=chr07:3726683..3731161 (- strand)

|             |             |             |             |             |            |
|-------------|-------------|-------------|-------------|-------------|------------|
| CTCGCAGCTC  | AAAAACCC TA | GCCGCCACTC  | CGCCATTTCG  | GTAAGGTTTG  | CTGCGACTCC |
| GCCGCGACGC  | ATCTTGCGCC  | GCCAGCCGCC  | GCCGCCGCGC  | GCCTCCTCCC  | CCGTCGACCT |
| CGGCTGACGC  | GCGGCGCCCT  | CGAGCTCGCG  | TCGCGTCGCG  | TCGTGTCCCT  | CTCGATGAGC |
| TGCTGCATCC  | TGGCGCTTTC  | TCTCGTTGCT  | CTGTGGGGGA  | GAAAAACCCC  | GTGGTTTCTG |
| GTGATCTCTG  | CTTGGTTAGC  | TAGCGTTCGT  | TTTGATGGC   | GATCTTTAGT  | TGGTTAGATG |
| CTGTTTGGGG  | TTGTGATCTC  | TGCTTGTTTA  | ACTGTTGGGT  | TGGGTGTGGT  | GATCTCTTCT |
| AGTTGGTTGT  | GATTCCCTGT  | TTGTTTAGTT  | GATATTGGGG  | TGTTTTGGTC  | TCAGCTTTTT |
| GTGTTGCTGC  | TTCGGATGGC  | GGTTTTCCCT  | AAATTCCTGT  | GTGGGTGTGA  | ACTTGATGT  |
| TGCATCCATG  | AACTGCTGTT  | GTTATCCTTA  | TGCTGATTTT  | TGGGTGTTTG  | GTTGGTGGA  |
| GTTGATGTTT  | TTTTATGGGT  | GGAGGAGAGG  | AGGAAGTTGA  | TTGCTGGATG  | GGAACCTACA |
| GGATGGTGAT  | TTCTCTGGTG  | GGTGCGGATG  | TGAGTTTGAG  | TGAGATGTGA  | AAACTAGGAA |
| CACAATATCA  | TCTTTAAGAT  | TGGAAGAAAA  | AATTGAGAAG  | AGGAGTCGCA  | TGACTCAAGC |
| CAACAGTAG   | GAAGAAACTA  | CAAATCACGC  | AACACATGAG  | AAAATAGAAA  | ACTTAAAGCC |
| CAATAGCCCA  | AAGTGGGGCT  | AAAGCCGTAG  | CAATCAAATA  | CCATGCCTTC  | CCTAACTCAG |
| AGCGCCGCAT  | GTCTCCTTT   | ATTTGTTCTT  | GTTCTCCTGC  | TGTACAGGAA  | AAGCATTGAC |
| CCCTTCACCA  | TTCAGTACTT  | ACTACTTGGG  | GTGTTGCGCA  | AATCAGTCAG  | CCATCTGGTG |
| GACATGCATA  | TGCACAAAGA  | ACACAATTTT  | ATGGA AAAAG | TCCC GCAAGG | AGTAAAAAAA |
| ATGTTTTAAC  | TTTTCATTTG  | TCTTGCA GTT | GATGGAGGCT  | CCGGCAAATA  | GCGTGGCAGT |
| GGCTGATGGG  | AACCCAAAGA  | CAGCGACAGA  | GACTCCGCGG  | GTGGAGGATT  | ACAAGGACGC |
| TGCCATGTAC  | TATGGAACGT  | ACCCGGCTTA  | TCTCTATGGA  | GGTGATGCAT  | TGCTGAGTTT |
| TTTCATTGTT  | CTGTTCATAC  | CGTTGTAGTT  | ATATGTTTTG  | CAAAACTGCT  | AGGTCAAAGT |
| TTTGAATGAT  | CTGTGTTTGT  | GTAAATGTAG  | CCTATGGTGG  | CTGGGGGGAG  | TACTCCACAT |
| ACCTGAGCCA  | TGATGGTGCA  | GAGACACCAA  | CTGCTGTGAG  | TTTTCCTTAC  | TGTGCTTCAC |
| CTCCATCAGT  | AAATACTTTT  | ATCCTATTCT  | GATACATTGT  | TCAGGATGTG  | ATATAAATAC |
| TGATGGTTTC  | CATACGCGTT  | GGAGTTGATC  | CATTTTGTGA  | ATGATAATGT  | TCTATTGCTT |
| ATTTCAAGGGT | GCTTATGGGG  | ATATGTACTA  | TGGCTATTCT  | CCATATGGTT  | ATTCAACTTC |
| AGGACATGAT  | AGTCAGATGT  | ATGGATCTCA  | GCATTACCAG  | TACCAACCGA  | CATACAACAA |



|            |            |             |            |            |            |
|------------|------------|-------------|------------|------------|------------|
| ACAACAGAAT | ACCACTGGCA | AGCCTTCCAA  | CAATGGAAAA | ACTGAAAATC | CGGCTGCACT |
| GCCCCAAGGG | GATGTCTCTG | CTAATGGTGT  | TGATAGTCTG | AAAGGTCAGA | AAAAGACGAA |
| TCTGCTCCCG | AAGGCAAGCC | AGAATACACC  | AGGTTCCAAC | GGTTCCTATG | GCCGACCTAG |
| TGGGCGTTTT | GGTAACTACC | AGAACCAAAC  | TAACCGAACA | ACTTATCCAT | GCTACAGTAG |
| TCAAATCTTC | AATGGCAAGC | AGCAAAAACT  | TCCCACTGGC | AATCGTTCTC | TGACAACTTC |
| CAATTCTAAA | AGCAAGGGAC | AGTCAAGGAA  | TCAGAACACA | TATCCTCATC | TCATG      |
| TTTTACTGTC | CTTAATGTTT | AATGGATATA  | TTTTAGTTCA | ATTACTTGAG | TCATTTTTTG |
| TTGATGTTGC | ATATCTTGTT | TTTTTGTTTC  | AAATGCTTGC | TCACCACAAT | CTGTCTATTT |
| GTAGCATTAT | TTGGTAGCCA | TGTCTCTTAT  | TTTCTAAAAA | GTATGTTTTT | GTTTTATGGC |
| GAATGTTTGC | ATTGATCTGT | TATTTAGCAT  | CATATTATAG | CGGGACATTG | TGTTATTACT |
| TATTTCCATT | GTTTACTGTT | TGGCTTGTC   | CCTATTATTA | AGATAACCCA | GATACTTACA |
| GGGTTAGGAT | TTGCTTATCT | AACTTTTGGA  | GTATCTCTTT | TAG        | GGTCTGC    |
| TTCTCCGTTG | GGACCACCAT | CAATTTACTC  | GGCTAGTGGA | ATGTATGGAT | ACAATGGGAG |
| TTCATATGGG | TCCGGCCTAT | GGTATGGATC  | ACACCTGTAT | GGTTCTGGAT | TGTACGGGGG |
| ATGGAATGCA | CTGTCGGATG | GCAAATACAA  | TCCCAGAGGA | AGAGGTAATG | GATCCTATGG |
| TTATATCCAT | GGAAATCAGG | ATGGGTTTAA  | TGAGCTAAGA | AGAGGGCCAA | GAAGTGGTCT |
| TTTCAATAAC | CAACAGGGAG | TTGGAGCTAC  | TGTTGCACCT | GTGAAGGGAC | AAGAGCTTTC |
| AGCCAGCGAT | AGCTCGCTTT | CTGTCATGAA  | GGATCAGTAT | AACCGGGCTG | ATTTTGTGGA |
| AACATACTCA | GATGCTAAAT | TCTTCATCAT  | CAAATCATAC | AGTGAGGATG | ATGTTCACAA |
| GAGCATTAA  | TACAATGTTT | GGGCTAGCAC  | ATCCAATGGT | AATAAAAAGC | TTGATGCTGC |
| TTATCAGGAG | GCTAAGGAAA | AATCAAGTGA  | TTCTTCTGTG | TTCCTTCTTT | TCTCT      |
| TTTTATCAGT | TCATTTGTGT | TTTCTTACAG  | TAGGTCATGA | TGATTTTCCC | TGTTTCTTAT |
| GCTGGCTGTT | TATTTTCATT | TCCCAG      | GTGA       | ATGCAAGTGG | TCAGTTTGT  |
| AGATGGTGGG | CCGTGTTGAT | TTTAACAAGA  | CATTGGAACA | CTGGCAACAG | GACAAGTGGA |
| CTGGCTGTTT | CCCTGTAAAG | TGGCATATTG  | TGAAGGATGT | TCCAAACAGC | TTACTGAAAC |
| ACATCATTCT | TGAAAACAAT | GAGAACAAAC  | CAGTCACAAA | TTGCAGAGAT | ACTCATGAGG |
| TATTATTTTT | GTTTCTAACC | CAGTCTTTTG  | TTCGTTGGCC | CTTAGGGCTT | CTAATGGTAT |
| GGCAAATTGG | TACTCCATTT | TGCCGTGAAT  | TATTGGAACA | AAAATGCTTA | ATAAGGATTT |
| TTGCACCTTT | TGTGGCGGCC | ACAGGTGAAA  | CTTGAGCCAG | GGCTTCAAGT | GCTTAAGATT |
| TTCAAGGACC | ATGTCTGCAA | GACGTCGTTA  | CTGGATGACT | TTGATTTCTA | TGATAATCGT |
| GAGAAGATGA | TGCAAGAGAG | GAAGGCAAAG  | CATCAACAAC | TGAAGAAG   | GT         |
| GCTCTTGCAT | TTGTTTTCTG | CTATTCTGTT  | GTGGTGTTTA | AACATAGTGC | TGATTGTTTT |
| TGTATGGCCA | TACATTGCAT | GTTTATTTGT  | GATATAAGTC | TATGGCATAT | AAAATGCTTC |
| CACTATTTGC | AGTGAGTAAT | AGAGCATGCA  | GCTAGAGTTT | TTCTCTCCTT | CCAGGACGGG |
| AATGAAAATG | TAAATTACT  | TATTTGTGAT  | TTTTGTGGTA | GTCTAATTTA | CCAAATTTGT |
| TAAGACCATG | TTTAATAGTT | AAGCCATCTC  | TTATATGAAA | GCCTTTGATT | AGCTCTCGGC |
| TTTCTTGAGC | ACTTATCACA | GGTGCTATAT  | GTTTGTGCTG | TAG        | GTCGTTG    |
| GCTTAATGCT | GTGGACACTG | AGAACAGCTT  | GTAACTGTG  | AAATCCAAAT | TGCAGGAAAC |
| AGCTGAGGTA | GAGATTGATG | TCTTAAACAA  | AGAGCCTCAT | GGTAAAGCAG | GACAAGTTGA |
| TGGGAAAGAG | AACGGTGTGT | TGGCCGTTTC  | TGTAAATGGT | GTTACCCAG  | AAGATGTTCA |
| GTTGACAAAC | GAGAAGTTGG | CCAGTTTGAG  | CGTCTGT    | TAA        | GTTTTTCTC  |
| CCATTGAGGG | GTGGTGTAAG | GTGAAGGGCT  | ATATAGGTTG | GGAAGGCAGC | AATCAAGGCA |
| ATTCAAGATC | CATTTGAGTT | TCCTTGTTGAG | TTTCTCCGTT | GCTTTTGTTT | AGGACTTGGA |
| GGTGGTTTCA | TAGGAGAGCT | AGAAGTTTAG  | CTGATTGTGT | CTGGTGAGAT | GTGCGGATAG |

|            |            |            |            |             |            |
|------------|------------|------------|------------|-------------|------------|
| CAGTAGAGGT | TTTTTGGA   | TTTGGTTTT  | AATGATGGAT | CATTGGTTTTG | CGCAGTTCCT |
| TTTCTTTTAT | ATTCTGTTCT | CTTTTGC    | GGGCAGGTGT | AGCTTTTTTTT | AGTATGTTTG |
| GTGTCTGAAC | CTGAAAGCAT | GTCAAGAGTG | TTTAAACCTG | GGAATTCAAT  | TAAGAAATTT |
| ACTCTTTTGT | TCCAATGCTT | ATTTTCTGAT | ATTGCTTTG  |             |            |

>Os07g0636000-01 class=Sequence position=chr07:26406702..26408800 (- strand)

|            |            |            |            |            |            |
|------------|------------|------------|------------|------------|------------|
| CTAAAATCCC | CTCCCCCAA  | CCCGCCGCCA | TGTCCTCCCC | GCCGCCGGCC | GCCGCCGCCT |
| CCCCCTCCTC | CGAGCTAACC | AAGTCCAAGA | AGAAGAAGAT | CAAGTCCAAG | GACGCCGCCA |
| CCGCCGCCGC | CGTCGACCCG | CCGTCCCTCG | CCGAGGCGGA | GGCGAAGACC | GACGGCTACC |
| TCATCAAGCC | GCAGTCGCTG | GTCCCCTCCC | TCGACACCTC | GACATGGCCG | CTCCTCCTCA |
| AGAACTACGA | CCGCCTCAAC | GTCCGCACCG | GCCACTACAC | CCCCTCCCC  | TCCGGCCACT |
| CGCCGCTCAA | GCGCCCCATC | GCCGAGTACC | TCCGCTACGG | CGTCATCAAC | CTCGACAAGC |
| CCTCCAACCC | CTCCTCGCAC | GAGGTCGTCG | CCTGGATCAA | GCGCCTCCTC | CGCGTCGACA |
| AGACCGGCCA | CAGCGGCACG | CTCGACCCCA | AGGTCACCGG | CAACCTCATC | GTCTGCGTCG |
| ACCGCGCCAC | CCGCCTCGTC | AAGTCGCAGC | AGGGCGCCGG | CAAGGAGTAC | GTCTGCGTCG |
| CGCGCTTCCA | CGCCGCAGTC | CCCACACCG  | CCCGCGTCGC | CCGCGCGCTC | GAGGCTCTCA |
| CCGGCGCCGT | GTTCCAGCGG | CCCCCGCTCA | TCTCCGCCGT | CAAGCGCCAG | CTCAGGGTGA |
| GGACCATCTA | CGAGAGCAAG | CTGCTCGAGC | ACGACGCCGA | CCGGCACCTC | GCCGTGTTCT |
| GGATCTCCTG | CGAGGCCCGG | ACCTATGTCA | GGACGCTCTG | CGTCCACCTT | GGCCTGCTGC |
| TCGGCGTCGG | CGCGCATATG | CAGGAGCTGC | GCCGCGTGCG | ATCGGGGATC | CTCGGGGAGC |
| AGGATAACAT | GGTCACGATG | CACGATGTCA | TGGACGCGAG | GTGGGCGATG | GACAACTACA |
| ACGATGAGAC | TTACTTGCGG | CGCATCGTGA | TGCCTCTCGA | GGTATTGCTT | ACTAGCTACA |
| AGAGGCTTGT | TGTTAAGGAC | TCTGCTGTCA | ATGCTATATG | CTATGGTGCT | AAGCTTATGA |
| TACCCGGGTT | GCTCCGGTTT | GAAAATGATA | TCGATGTCGG | GGAGGAGGTG | GTTCTCATGA |
| CCACTAAAGG | AGAGGCCATT | GCTATTGGTA | TTGCCGAGAT | GACCACCGCT | GTTATGGCGA |
| CTTGTGACCA | TGGTGCAGTC | GCAAAGATTA | AGAGGGTGGT | GATGGATAGA | GACACGTATC |
| CGAGGAAGTG | GGGGCTTGGT | CCGTTGCGC  | TCAAGAAGAA | AAAGATGGTC | GCAGAGGGTT |
| TACTGGATAA | GCATGGGAAG | CCAAATGAGA | AGACCCACAG | TGAGTGGATC | CGGAATGTGG |
| CACTTCCTAC | TGGTGGTGAT | GCGATGATCG | CTAGCATTGC | AGCTGCTCCT | GAAGAGGCCA |
| AGGTGAAGGC | GGAACAGGAT | GTGGTTGCGA | CTGAAGAGGT | CAAGGAGAAG | AAAAAGAAGA |
| AGAAGCACAA | GGATGAGGAG | GATGCTGCCG | ACGAAGGCCG | CAAGAGGAAG | ATTGAGGATG |
| ATGACGCGTC | TGCTTCTGTG | CCTGTAAAGA | AGATCAAGGT | TGAAGAGAGT | GCTGAGGAGG |
| TAGAAGGGGA | GAAGAGTGAG | AAGAAGAAGA | AGAAGAAGAA | AGACAAGGGT | GAACAAGGAT |
| CAGGTGATGC | AGAGGTGAAG | GAAGAGAAGG | CTGATATATC | TGATGGGGAG | AAGGTTGGCA |
| GTGAGAAGAA | AAAGAAAAAG | AAGAAGAGCA | AGGAAGGAGG | TGATGTTGTG | GATCCAGAGA |
| GCGCAGCCAA | TGGAGATGGC | GTGGAAGCTG | AGAAAAGCGA | AAAGAAAAAG | GAGAAGAAAA |
| AGAAGAAGAG | TCGAGATACA | GAGGAGGCAT | AA         | TAGGTAGA   | ATTATAGTAC |
| AATGTATCCT | TTTGCTGCGG | TTGTAGGGAG | TTTGAGATGC | CTATCTTTCC | TTGCTGTGAT |
| CCCTTTTCAA | CCATTAATGG | TTTCAAAGGC | CTAATGCCCA | TCCTTGAATT | ACTACCATTT |
| TACTGCTGTG | AAGTACTGTG | GTAAGTAGCG | ATATTTCCAT | TGAACTTGTT | GAACAATGAG |
| CCATGTATTG | CTGTCCTGT  | TTTCAGTTAA | TGCAATGAGT | TTTGCTTACA | CCTCACAGT  |
